# Supplementary material
Source: ML conference proceedings conference paper supplement (https://openreview.net/forum?id=KfOUAlraMP)
Supplement: supplementary_material [file attachment]

---

# Appendix to Wasserstein distributional robustness of neural networks

---

Anonymous Author(s)

Affiliation

Address

email

## 1 A Bounds on Adversarial Accuracy

2 Recall that Proposition 5.2 states the following tower-like property

$$V(\delta) = \sup_{Q \in B_\delta(P)} \mathbf{E}_Q[C(\delta)\mathbb{1}_S + W(\delta)\mathbb{1}_{S^c}] = o(\delta),$$

3 where

$$C(\delta) = \sup_{Q \in B_\delta(P)} \mathbf{E}_Q[J_\theta(x, y)|S] \quad \text{and} \quad W(\delta) = \sup_{Q \in B_\delta(P)} \mathbf{E}_Q[J_\theta(x, y)|S^c].$$

4

5 *Proof of Proposition 5.2.* One direction follows directly from the usual tower property of conditional  
6 expectation:

$$\begin{aligned} V(\delta) &= \sup_{Q \in B_\delta(P)} \mathbf{E}_Q[J(x, y)] = \sup_{Q \in B_\delta(P)} \mathbf{E}_Q[\mathbf{E}_Q[J(x, y)|\sigma(S)]] \\ &\leq \sup_{Q \in B_\delta(P)} \mathbf{E}_Q[C(\delta)\mathbb{1}_S + W(\delta)\mathbb{1}_{S^c}]. \end{aligned}$$

7 For the other direction, note that

$$Q(E|S) = Q(E \cap S)/Q(S) \quad \text{and} \quad Q(E|S^c) = Q(E \cap S^c)/Q(S^c),$$

8 are well defined for any Borel  $E$  by Assumption 5.1. Take an arbitrary  $\varepsilon > 0$  and  $Q_c, Q_w \in B_\delta(P)$   
9 such that

$$\mathbf{E}_{Q_c}[J(x, y)|S] \geq C(\delta) - \varepsilon \quad \text{and} \quad \mathbf{E}_{Q_w}[J(x, y)|S^c] \geq W(\delta) - \varepsilon.$$

10 We further take  $Q_\star \in B_\delta(P)$  such that

$$\mathbf{E}_{Q_\star}[C(\delta)\mathbb{1}_S + W(\delta)\mathbb{1}_{S^c}] \geq \sup_{Q \in B_\delta(P)} \mathbf{E}_Q[C(\delta)\mathbb{1}_S + W(\delta)\mathbb{1}_{S^c}] - \varepsilon,$$

11 and write distribution  $\tilde{Q}$  given by

$$\tilde{Q}(E) = Q_c(E|S)Q_\star(S) + Q_w(E|S^c)Q_\star(S^c).$$

12 These give us

$$\begin{aligned} \sup_{Q \in B_\delta(P)} \mathbf{E}_Q[C(\delta)\mathbb{1}_S + W(\delta)\mathbb{1}_{S^c}] &\leq \mathbf{E}_{Q_\star}[C(\delta)\mathbb{1}_S + W(\delta)\mathbb{1}_{S^c}] + \varepsilon \\ &\leq \mathbf{E}_{Q_\star}[\mathbf{E}_{Q_c}[J_\theta(x, y)|S]\mathbb{1}_S + \mathbf{E}_{Q_w}[J_\theta(x, y)|S^c]\mathbb{1}_{S^c}] + 3\varepsilon \\ &= \mathbf{E}_{\tilde{Q}}[J_\theta(x, y)] + 3\varepsilon. \end{aligned}$$

13 Recall Assumption 5.1 (ii) gives for any  $Q \in B_\delta(P)$

$$\mathcal{W}_p(Q(\cdot|S), P(\cdot|S)) + \mathcal{W}_p(Q(\cdot|S^c), P(\cdot|S^c)) = o(\delta).$$

Now we take  $\pi_c \in \Pi(Q_\star(\cdot|S), Q_c(\cdot|S))$  such that  $\mathbf{E}_{\pi_c}[d(X, Y)^p] = \mathcal{W}_p(Q_\star(\cdot|S), Q_c(\cdot|S))^p$ , and similarly  $\pi_w \in \Pi(Q_\star(\cdot|S^c), Q_w(\cdot|S^c))$ . Then by definition of  $\tilde{Q}$ , we have  $\pi = Q_\star(S)\pi_c + Q_\star(S^c)\pi_w \in \Pi(Q_\star, \tilde{Q})$ . Moreover, we derive

$$\begin{aligned}\mathcal{W}_p(Q_\star, \tilde{Q})^p &\leq \mathbf{E}_\pi[d(X, Y)^p] = Q_\star(S)\mathbf{E}_{\pi_c}[d(X, Y)^p] + Q_\star(S^c)\mathbf{E}_{\pi_w}[d(X, Y)^p] \\ &= Q_\star(S)\mathcal{W}_p(Q_\star(\cdot|S), Q_c(\cdot|S))^p + Q_\star(S^c)\mathcal{W}_p(Q_\star(\cdot|S^c), Q_w(\cdot|S^c))^p \\ &= o(\delta^p),\end{aligned}$$

which implies  $\mathcal{W}_p(P, \tilde{Q}) = \delta + o(\delta)$  by triangle inequality. Hence, by  $L$ -Lipschitzness of  $J_\theta$  and (Bartl et al., 2021, Appendix Corollary 7.5) we obtain

$$\sup_{Q \in B_\delta(P)} \mathbf{E}_Q[C(\delta)\mathbb{1}_S + W(\delta)\mathbb{1}_{S^c}] \leq V(\delta + o(\delta)) + 3\varepsilon \leq V(\delta) + o(\delta) + 3\varepsilon.$$

Finally, by taking  $\varepsilon \rightarrow 0$ , we deduce

$$V(\delta) = \sup_{Q \in B_\delta(P)} \mathbf{E}_Q[C(\delta)\mathbb{1}_S + W(\delta)\mathbb{1}_{S^c}] + o(\delta)$$

which concludes the proof of Proposition 5.2.  $\square$

Now, we present the proof of the lower bound estimate in Theorem 5.1,

$$\mathcal{R}_\delta = \frac{A_\delta}{A} \geq \frac{W(0) - V(0)}{W(0) - V(0)}.$$

*Proof of Theorem 5.1.* By adding and subtracting  $W(\delta)\mathbb{1}_S$ , Proposition 5.2 now gives

$$\begin{aligned}V(\delta) &= \sup_{Q \in B_\delta(P)} \mathbf{E}_Q[C(\delta)\mathbb{1}_S + W(\delta)\mathbb{1}_{S^c}] + o(\delta) \\ &= \sup_{Q \in B_\delta(P)} \mathbf{E}_Q[W(\delta) - (W_\delta - C(\delta))\mathbb{1}_S] + o(\delta) \\ &= W(\delta) - (W(\delta) - C(\delta))A_\delta + o(\delta).\end{aligned}$$

Naturally, we can rewrite loss  $V(0)$  using the usual tower property

$$V(0) = AC(0) + (1 - A)W(0) = W(0) - (W(0) - C(0))A.$$

Together these yield

$$\begin{aligned}V(\delta) - V(0) &= (1 - A_\delta)(W(\delta) - W(0)) + A_\delta(C(\delta) - C(0)) + (W(0) - C(0))(A - A_\delta) + o(\delta) \\ &\geq (W(0) - C(0))(A - A_\delta) + o(\delta).\end{aligned}$$

Plugging in  $C(0) = [V(0) - (1 - A)W(0)]/A$  completes the proof.  $\square$

## B Bounds on Out-of-Sample Performance

The concentration inequality in Fournier and Guillin (2015) is pivotal to derive the out-of-sample performance bounds. It characterizes how likely an empirical measure can deviate from its generating distribution. Recall we denote  $\hat{P}$  as the empirical measure of training set  $\mathcal{D}_{tr}$  with size  $N$  and  $\check{P}$  as the empirical measure of test set  $\mathcal{D}_{tt}$  with size  $M$ . We use the same  $\hat{\cdot}, \check{\cdot}$  notations to denote quantities computed from  $\hat{P}$  and  $\check{P}$ , respectively. We restate the concentration inequality as

$$\mathbb{P}(\mathcal{W}_p(\hat{P}, P) \geq \varepsilon) \leq K \exp(-KN\varepsilon^n),$$

where  $K$  is a constant only depending on  $n$  and  $p$ . For convenience,  $K$  might change from line to line in this section. Together with Theorem 5.1, we give an out-of-sample clean accuracy guarantee in Corollary 5.3.

*Proof of Corollary 5.3.* By triangle inequality and concentration inequality, we have

$$\mathbb{P}(\mathcal{W}_p(\check{P}, \hat{P}) \geq 2\varepsilon) \leq \mathbb{P}(\mathcal{W}_p(\check{P}, P) \geq \varepsilon) + \mathbb{P}(\mathcal{W}_p(P, \hat{P}) \geq \varepsilon) \leq 2K \exp(-K\varepsilon^n \min\{M, N\}).$$

With Theorem 5.1, it implies that with probability at least  $1 - 2K \exp(-K\varepsilon^n \min\{M, N\})$ , we have

$$\check{A} \geq \hat{A}_{2\varepsilon} \geq \hat{A}\hat{R}_{2\varepsilon}^l + o(\varepsilon).$$

$\square$

38 The following results provide a guarantee on the out-of-sample adversarial performance.

39 *Proof of Theorem 5.4.* Estimates in [Fournier and Guillin \(2015\)](#) imply that with probability at least  
 40  $1 - K \exp(-KN\varepsilon^n)$ , we have  $B_\delta(\hat{P}) \subseteq B_{\delta+\varepsilon}(P)$ . Hence, we derive  $V(\delta) \leq \hat{V}(\delta + \varepsilon)$ . On the  
 41 other hand, since  $J_\theta$  is  $L$ -Lipschitz, from ([Bartl et al., 2021](#), Appendix Corollary 7.5) we obtain

$$\hat{V}(\delta + \varepsilon) = \hat{V}(\delta) + \varepsilon \sup_{Q \in B_\delta^*(\hat{P})} \left( \mathbf{E}_Q \|\nabla_x J_\theta(x, y)\|_*^q \right)^{1/q} + o(\varepsilon),$$

42 where  $B_\delta^*(\hat{P}) = \arg \max_{Q \in B_\delta(\hat{P})} \mathbf{E}_Q[J_\theta(x, y)]$ . Combining above results, we conclude that with  
 43 probability at least  $1 - K \exp(-KN\varepsilon^n)$

$$V(\delta) \leq \hat{V}(\delta) + \varepsilon \sup_{Q \in B_\delta^*(\hat{P})} \left( \mathbf{E}_Q \|\nabla_x J_\theta(x, y)\|_*^q \right)^{1/q} + o(\varepsilon) \leq \hat{V}(\delta) + L\varepsilon.$$

44 □

45 *Proof Corollary 5.5.* By Theorem 5.1, we have

$$\Delta A_\delta(P) \leq \frac{V(\delta) - V(0)}{W(0) - C(0)} + o(\delta).$$

46 We now bound the numerator and denominator separately. By taking  $\varepsilon = \delta$  in Theorem 5.4, we have  
 47 with probability at least  $1 - K \exp(-KN\delta^n)$ ,  $V(\delta) \leq \hat{V}(\delta) + L\delta$ . Similarly, we can also show that  
 48  $V(0) \geq \hat{V}(0) - L\delta$ . Hence, we have with probability at least  $1 - K \exp(-KN\delta^n)$ ,

$$V(\delta) - V(0) \leq \hat{V}(\delta) - \hat{V}(0) + 2L\delta.$$

49 For the denominator, notice that  $\mathbb{P}(\hat{P} \in B_\delta(P)) \geq 1 - K \exp(-KN \exp(\delta^n))$ . By Assumption 5.1  
 50 (ii), we have with probability at least  $1 - K \exp(-KN\delta^n)$ ,

$$\mathcal{W}_p(\hat{P}(\cdot|S), P(\cdot|S)) + \mathcal{W}_p(\hat{P}(\cdot|S^c), P(\cdot|S^c)) = o(\delta).$$

51 This implies

$$|C(0) - W(0) - \hat{C}(0) + \hat{W}(0)| = o(\delta).$$

52 Combining above results, we conclude that with probability at least  $1 - K \exp(-KN\delta^n)$ ,

$$\Delta A_\delta(P) \leq \frac{\hat{V}(\delta) - \hat{V}(0)}{\hat{W}(0) - \hat{C}(0)} + \frac{2L\delta}{\hat{W}(0) - \hat{C}(0)} + o(\delta).$$

53 □

## 54 C W-PGD Algorithm

55 We give the details of W-PGD algorithm implemented in this paper. Recall in Section 4, we propose

$$x^{t+1} = \text{proj}_\delta(x^t + \alpha h(\nabla_x J_\theta(x^t, y)) \Upsilon^{-1} \nabla_x J_\theta(x^t, y) \|_s^{q-1}), \quad (1)$$

56 where we take  $\|\cdot\| = \|\cdot\|_r$  and hence  $h$  is given by  $\langle h(x), x \rangle = \|x\|_s$ . In particular,  $h(x) = \text{sgn}(x)$   
 57 for  $s = 1$  and  $h(x) = x/\|x\|_2$  for  $s = 2$ . The projection step  $\text{proj}_\delta$  is based on any off-the-shelf  
 58 optimal transport solver  $\mathcal{S}$  which pushes the adversarial images back into the Wasserstein ball along  
 59 the geodesics. The solver  $\mathcal{S}$  gives the optimal matching  $T$  between the original test data  $\mathcal{D}_{tt}$  and the  
 60 perturbed test data  $\mathcal{D}'_{tt}$ . Formally,  $\text{proj}_\delta$  maps

$$x' \mapsto x + \delta d^{-1}(T(x) - x),$$

61 where  $d = \left\{ \frac{1}{|\mathcal{D}_{tt}|} \sum_{(x,y) \in \mathcal{D}_{tt}} \|T(x) - x\|_r^p \right\}^{1/p}$  the Wasserstein distance between  $\check{P}$  and  $\check{P}'$ . See  
 62 Algorithm 1 for pseudocodes. In numerical experiments, due to the high computational cost of the  
 63 OT solver, we always couple each image with its own perturbation.

---

**Algorithm 1: W-PGD Attack**

**Input:** Model parameter  $\theta$ , attack strength  $\delta$ , ratio  $r$ , iteration step  $I$ , OT solver  $\mathcal{S}$ ;

**Data:** Test set  $\mathcal{D}_{tt} = \{(x, y) | (x, y) \sim P\}$  with size  $M$ ;

```
def proj_delta(D_tt, D'_tt):
```

```
| T =  $\mathcal{S}(\mathcal{D}_{tt}, \mathcal{D}'_{tt});$  // Generate transport map from OT solver
```

$$d = \left\{ \frac{1}{M} \sum_{(x,y) \in \mathcal{D}_{tt}} \|T(x) - x\|_r^p \right\}^{1/p}; \quad // \text{ Calculate the Wasserstein distance}$$

```
for  $(x, y)$  in  $\mathcal{D}_{tt}$  do
```

```

x' ← x + δd-1(T(x) - x); // Project back to the Wasserstein ball

```

$$\lfloor x' \leftarrow \text{clamp}(x', 0, 1);$$

```

    return  $\mathcal{D}'_{tt}$ .

```

**def** attack( $\mathcal{D}_{tt}$ ):

```
|  $\alpha \leftarrow r\delta/I;$  // Calculate stepsize
```

$$\mathcal{D}_{tt}^{adv} \leftarrow \mathcal{D}_{tt};$$
**for**  $1 \leq i \leq I$  **do**
$$\Upsilon = \left( \frac{1}{M} \sum_{(x,y) \in \mathcal{D}_{tt}^{adv}} \|\nabla_x J_\theta(x, y)\|_s^q \right)^{1/q}; \quad // \text{ Calculate } \Upsilon$$
**for**  $(x, y) \in \mathcal{D}_{tt}^{adv}$  **do**
$$\lfloor (x, y) \leftarrow (x + \alpha h(\nabla_x J_\theta(x, y)) \|\Upsilon^{-1} \nabla_x J_\theta(x, y)\|_s^{q-1}, y);$$
$$\mathcal{D}_{tt}^{adv} = \text{proj}_{\delta}(\mathcal{D}_{tt}, \mathcal{D}_{tt}^{adv});$$

```

    return  $\mathcal{D}_{tt}^{adv}$ .

```

## 65 D Wasserstein Distributionally Adversarial Training

66 Theorem 4.1 offers natural computationally tractable approximations to the W-DRO training objective

$$\inf_{\theta \in \Theta} \sup_{Q \in B_\delta(P)} \mathbf{E}_Q[J_\theta(x, y)]$$

67 and its extension

$$\inf_{\theta \in \Theta} \sup_{\pi \in \Pi_\delta(P, \cdot)} \mathbf{E}_\pi[J_\theta(x, y, x', y')].$$

68 First, consider a regularized optimization problem:

$$\inf_{\theta \in \Theta} \mathbf{E}_P[J_\theta(x, y) + \delta \Upsilon].$$

The extra regularization term  $\delta\Upsilon$  allows us to approximate the W-DRO objective above. A similar approach has been studied in [García Trillos and García Trillos \(2022\)](#) in the context of Neural ODEs, and [Sinha et al. \(2018\)](#) considered Wasserstein distance penalization and used duality.

72 Training is done by replacing  $P$  with  $\hat{P}$ . Note that  $\hat{\Upsilon}$  is a statistics over the whole data set. In order to  
73 implement stochastic gradient descent method, an asynchronous update of the parameters is needed.  
74 We consider  $\|\cdot\|_* = \|\cdot\|_s$  and, by a direct calculation, obtain

$$\nabla_{\theta} \hat{\Upsilon} = \hat{\Upsilon}^{1-q} \mathbf{E}_{\hat{P}}[\langle \nabla_x \nabla_{\theta} J_{\theta}(x, y), \text{sgn}(\nabla_x J_{\theta}(x, y)) \rangle \|\nabla_x J_{\theta}(x, y)\|_s^{q-1}].$$

75 We calculate the term  $\hat{\Upsilon}^{1-q}$  from the whole training dataset using parameter  $\theta^*$  from previous epoch;  
76 we estimate

$$\mathbf{E}_{\hat{P}}[\langle \nabla_x \nabla_\theta J_\theta(x, y), \text{sgn}(\nabla_x J_\theta(x, y)) \rangle \|\nabla_x J_\theta(x, y)\|_s^{q-1}]$$

on a mini-batch and update current parameter  $\theta$  after each batch. At the end of an epoch, we update  $\theta^*$  to  $\theta$ . See Algorithm 2 for pseudocodes.

79 Another classical approach consists in clean training the network but on the adversarial perturbed  
80 data. To this we employ the Wasserstein FGSM attack described in Section 4 and shift training data  
81  $(x, y)$  by

$$(x, y) \mapsto \left( \text{proj}_\delta(x + \delta h(\nabla_x J_\theta(x, y)) \|\hat{\Upsilon}^{-1} \nabla_x J_\theta(x, y)\|_s^{q-1}), y \right).$$

82 Similarly to the discussion above, an asynchronous update of parameters is applied, see Algorithm 3  
 83 for details. Empirical evaluation of the performance of Algorithms 2 and 3 is left for future research.

---

**Algorithm 2:** Loss Regularization

---

**Input:** Initial parameter  $\theta_0$ , hyperparameter  $\delta$ , learning rate  $\eta$ ;

**Data:** Training set  $\mathcal{D}_{tr} = \{(x, y) | (x, y) \sim P\}$  with size  $N$ ;

$\theta^* \leftarrow \theta_0, \theta \leftarrow \theta_0$ ;

**repeat**

$\Upsilon = \left( \frac{1}{N} \sum_{(x,y) \in \mathcal{D}_{tr}} \|\nabla_x J_{\theta^*}(x, y)\|_s^q \right)^{1/q}$ ; // Calculate  $\Upsilon$  from  $\theta^*$

**repeat**

84 Generate a mini-batch  $B$  with size  $|B|$ ;  
 // Calculate gradient  $\nabla_{\theta} J_{\theta}(x, y)$   
 $\nabla_{\theta} J_{\theta}(x, y) = \frac{1}{|B|} \sum_{(x,y) \in B} \nabla_{\theta} J_{\theta}(x, y)$ ;  
 // Calculate gradient  $\nabla_{\theta} \Upsilon$   
 $\nabla_{\theta} \Upsilon = \Upsilon^{1-q} \frac{1}{|B|} \sum_{(x,y) \in B} \langle \nabla_x \nabla_{\theta} J_{\theta}(x, y), h(\nabla_x J_{\theta}(x, y)) \rangle \|\nabla_x J_{\theta}(x, y)\|_s^{q-1}$ ;  
 // Update  $\theta$  by stochastic gradient descent  
 $\theta \leftarrow \theta - \eta(\nabla_{\theta} J_{\theta}(x, y) + \delta \nabla_{\theta} \Upsilon)$ ;  
**until the end of epoch**;  
 $\theta^* \leftarrow \theta$ ;

**until the end condition.**

---



---

**Algorithm 3:** Adversarial Data Perturbation

---

**Input:** Initial parameter  $\theta_0$ , hyperparameter  $\delta$ , learning rate  $\eta$ ;

**Data:** Training set  $\mathcal{D}_{tr} = \{(x, y) | (x, y) \sim P\}$  with size  $N$ ;

$\theta^* \leftarrow \theta_0, \theta \leftarrow \theta_0$ ;

**repeat**

$\Upsilon = \left( \frac{1}{N} \sum_{(x,y) \in \mathcal{D}_{tr}} \|\nabla_x J_{\theta^*}(x, y)\|_s^q \right)^{1/q}$ ; // Calculate  $\Upsilon$  from  $\theta^*$

**repeat**

85 Generate a mini-batch  $B$  with size  $|B|$ ;  
 // Do W-FGSM attack on  $B$   
 $(x, y) \leftarrow (\text{proj}_{\delta}(x + \delta h(\nabla_x J_{\theta}(x, y)) \|\Upsilon^{-1} \nabla_x J_{\theta}(x, y)\|_s^{q-1}), y)$ ;  
 // Update  $\theta$  by stochastic gradient descent  
 $\theta \leftarrow \theta - \eta \frac{1}{|B|} \sum_{(x,y) \in B} \nabla_{\theta} J_{\theta}(x, y)$ ;  
**until the end of epoch**;  
 $\theta^* \leftarrow \theta$ ;

**until the end condition.**

---

## 86 E Robust Performance Bounds

87 As pointed out in Section 6, with attack budget  $\delta = 8/255$  some neural networks have lower bounds  
 88  $\mathcal{R}^l$  surpassing the reference value  $\mathcal{R}$  obtained from AutoAttack. It is because for most of neural  
 89 networks  $\delta = 8/255$  is outside the linear approximation region of the adversarial loss  $V(\delta)$ , and we  
 90 underestimate  $V(\delta)$  by using first order approximations in Theorem 4.1. In Figure E.1, we plot our  
 91 proposed bounds  $\mathcal{R}^u$  and  $\mathcal{R}^l$  against  $\mathcal{R}$  for  $(\mathcal{W}_{\infty}, l_{\infty})$  threat model with  $\delta = 8/255$ .

92 In general, to compute more accurate lower bounds on the adversarial accuracy, as explained in  
 93 Section 6, we can consider the first lower bound in (13). We thus introduce  $\mathcal{R}^l(n)$  given by

$$\mathcal{R}^l(n) = \frac{W(0) - V(\delta, n)}{W(0) - V(0)},$$

94 where  $V(\delta, n)$  is the approximated adversarial loss computed by a W-PDG- $(n)$  attack. In Figures  
 95 E.2 and E.3, we include plots for different bounds of  $\mathcal{R}$  under  $\mathcal{W}_2$  threat models which illustrate  
 96 the changing performance of the lower bound in Theorem 5.1 as  $V(\delta)$  is computed to an increasing  
 97 accuracy. We achieve this performing a W-PDG- $(n)$  attack, where  $n = 5, 50$ . An  $n = 50$  attack takes

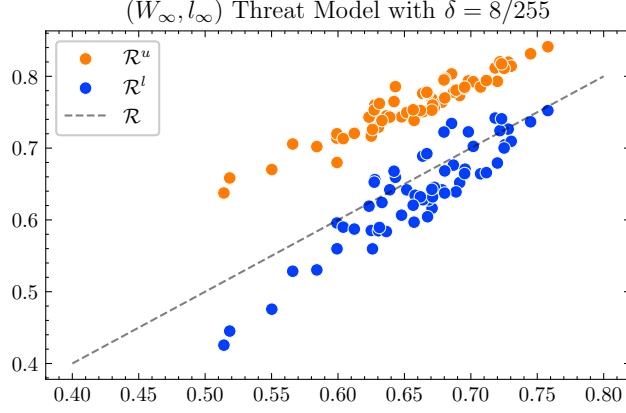

Figure E.1:  $\mathcal{R}^u$  &  $\mathcal{R}^l$  versus  $\mathcal{R}$ . Bounds are computed based on CE loss across neural networks on RobustBench under a  $(\mathcal{W}_\infty, l_\infty)$  threat model with budget  $\delta = 8/255$ . At this  $\delta$  linear approximation may be inefficient as seen from the blue dots crossing the diagonal.

10 times more computational time than the  $n = 5$  attack and the latter is 5 times more computational  
 99 costly than the one-step bound  $\mathcal{R}^l$ . The plots thus illustrate a trade-off between computational time  
 100 and accuracy of the proposed lower bound. For clarity, we also point out that Figure E.2 has a  
 101 different scaling from the other plots.

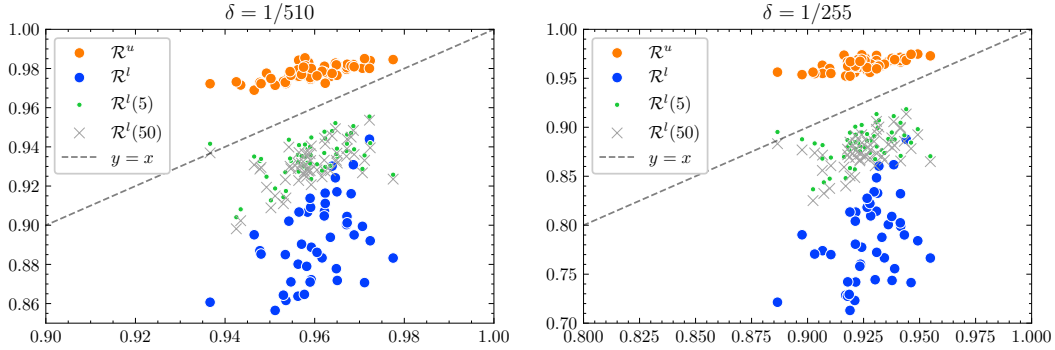

Figure E.2: Comparison of lower bounds computed from different W-PDG- $(n)$  attacks, where  $n = 5, 50$ . Bounds are computed based on CE loss across neural networks on RobustBench under  $(\mathcal{W}_2, l_\infty)$  threat models with budget  $\delta = 1/510, 1/255$ .

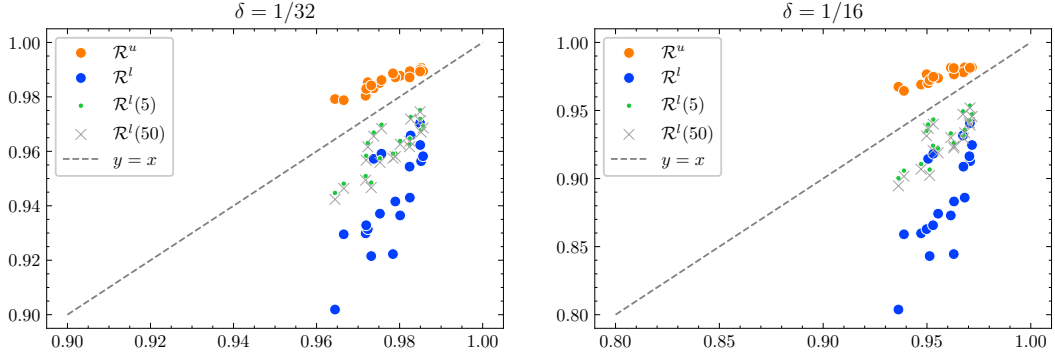

Figure E.3: Comparison of lower bounds computed from different W-PDG- $(n)$  attacks, where  $n = 5, 50$ . Bounds are computed based on ReDLR loss across neural networks on RobustBench under  $(\mathcal{W}_2, l_2)$  threat models with budget  $\delta = 1/32, 1/16$ .

## F Additional Numerical Results

In Tables F.1 and F.2, we report the clean accuracy and the adversarial accuracy under different threat models for all but 4 neural networks available on RobustBench (model zoo).<sup>1</sup> All networks are named after their labels on RobustBench (model zoo). We remove Standard  $l_\infty$ -network and Standard  $l_2$ -network because they are not robust to any attacks. In addition, we also remove Kang2021Stable which contains NeuralODE blocks and Ding2020MMA which has a huge gap between adversarial accuracies obtained from PGD and AutoAttack.

In Tables F.3, F.4, F.5 and F.6, we include the complete list of  $\mathcal{R}$  and its bounds used in Figure 3. We write  $\Delta\mathcal{R}^u = \mathcal{R}^u - \mathcal{R}$  and  $\Delta\mathcal{R}^l = \mathcal{R}^l - \mathcal{R}$ .

Table F.1: Complete list of adversarial accuracies under  $(\mathcal{W}_\infty, l_\infty)$  and  $(\mathcal{W}_2, l_\infty)$  threat models.

| Network                              | Clean | $\delta=1/8$         |                 | $\delta=1/4$         |                 | $\delta=1/8$         |                 |
|--------------------------------------|-------|----------------------|-----------------|----------------------|-----------------|----------------------|-----------------|
|                                      |       | $\mathcal{W}_\infty$ | $\mathcal{W}_2$ | $\mathcal{W}_\infty$ | $\mathcal{W}_2$ | $\mathcal{W}_\infty$ | $\mathcal{W}_2$ |
| Augustin2020Adversarial              | 91.08 | 87.88                | 82.03           | 84.48                | 73.17           | 72.91                | 56.66           |
| Augustin2020Adversarial_34_10        | 92.23 | 89.20                | 83.70           | 85.80                | 74.06           | 76.25                | 56.33           |
| Augustin2020Adversarial_34_10_extra  | 93.96 | 91.63                | 84.86           | 88.32                | 75.04           | 78.79                | 59.73           |
| Ding2020MMA                          | 88.02 | 83.57                | 77.69           | 78.44                | 69.67           | 66.09                | 53.47           |
| Engstrom2019Robustness               | 90.83 | 86.81                | 81.99           | 82.37                | 73.77           | 69.24                | 57.77           |
| Gowal2020Uncovering                  | 90.89 | 87.62                | 83.19           | 84.26                | 75.83           | 74.50                | 60.94           |
| Gowal2020Uncovering_extra            | 94.73 | 92.64                | 88.08           | 89.52                | 79.74           | 80.53                | 60.18           |
| Rade2021Helper_R18_ddpm              | 90.57 | 88.03                | 83.57           | 84.58                | 77.26           | 76.15                | 62.74           |
| Rebuffi2021Fixing_28_10_cutmix_ddpm  | 91.79 | 89.26                | 86.09           | 86.43                | 81.06           | 78.80                | 67.18           |
| Rebuffi2021Fixing_70_16_cutmix_ddpm  | 92.41 | 90.36                | 87.27           | 87.69                | 81.67           | 80.42                | 67.93           |
| Rebuffi2021Fixing_70_16_cutmix_extra | 95.74 | 93.78                | 89.73           | 91.18                | 81.59           | 82.32                | 63.43           |
| Rebuffi2021Fixing_R18_cutmix_ddpm    | 90.33 | 87.48                | 84.24           | 84.48                | 78.38           | 75.86                | 63.85           |
| Rice2020Overfitting                  | 88.68 | 85.07                | 80.62           | 80.35                | 73.28           | 67.68                | 56.83           |
| Rony2019Decoupling                   | 89.04 | 84.74                | 78.47           | 79.25                | 69.39           | 66.44                | 51.15           |
| Sehwag2021Proxy                      | 90.93 | 88.42                | 85.50           | 85.66                | 80.50           | 77.24                | 67.96           |
| Sehwag2021Proxy_R18                  | 89.76 | 87.08                | 83.34           | 83.87                | 77.62           | 74.41                | 65.02           |
| Wang2023Better_WRN-28-10             | 95.16 | 93.44                | 88.99           | 90.79                | 82.58           | 83.68                | 68.65           |
| Wang2023Better_WRN-70-16             | 95.54 | 93.76                | 89.94           | 91.79                | 83.47           | 84.97                | 70.09           |
| Wu2020Adversarial                    | 88.51 | 85.32                | 81.33           | 82.05                | 75.31           | 73.66                | 62.21           |

<sup>1</sup><https://github.com/RobustBench/robustbench>

Table F.2: Complete list of adversarial accuracies under  $(\mathcal{W}_\infty, l_\infty)$  and  $(\mathcal{W}_2, l_\infty)$  threat models.

| Network                              | Clean | $\delta=2/255$       |                 | $\delta=4/255$       |                 | $\delta=8/255$       |                 |
|--------------------------------------|-------|----------------------|-----------------|----------------------|-----------------|----------------------|-----------------|
|                                      |       | $\mathcal{W}_\infty$ | $\mathcal{W}_2$ | $\mathcal{W}_\infty$ | $\mathcal{W}_2$ | $\mathcal{W}_\infty$ | $\mathcal{W}_2$ |
| Addepalli2021Towards_RN18            | 80.23 | 73.85                | 68.54           | 66.70                | 58.76           | 51.06                | 42.91           |
| Addepalli2021Towards_WRN34           | 85.32 | 79.87                | 73.41           | 73.18                | 64.60           | 58.04                | 48.12           |
| Addepalli2022Efficient_RN18          | 85.71 | 79.16                | 71.75           | 71.37                | 59.59           | 52.48                | 37.84           |
| Addepalli2022Efficient_WRN34_10      | 88.70 | 82.95                | 74.75           | 75.52                | 63.35           | 57.81                | 42.03           |
| Andriushchenko2020Understanding      | 79.85 | 72.30                | 66.16           | 64.45                | 55.83           | 43.93                | 37.86           |
| Carmon2019Unlabeled                  | 89.69 | 84.59                | 77.02           | 77.87                | 66.59           | 59.53                | 46.32           |
| Chen2020Adversarial                  | 86.04 | 79.68                | 67.45           | 71.61                | 51.23           | 51.56                | 29.66           |
| Chen2020Efficient                    | 85.34 | 78.48                | 70.91           | 70.64                | 59.24           | 51.12                | 39.32           |
| Chen2021LTD_WRN34_10                 | 85.21 | 79.78                | 72.74           | 72.97                | 61.86           | 56.94                | 41.48           |
| Chen2021LTD_WRN34_20                 | 86.03 | 80.71                | 75.31           | 74.19                | 64.95           | 57.71                | 44.87           |
| Cui2020Learnable_34_10               | 88.22 | 81.95                | 71.25           | 74.20                | 57.88           | 52.86                | 40.14           |
| Cui2020Learnable_34_20               | 88.70 | 82.20                | 72.16           | 74.46                | 57.74           | 53.57                | 37.73           |
| Dai2021Parameterizing                | 87.02 | 82.39                | 77.35           | 76.96                | 69.28           | 61.55                | 52.43           |
| Debenedetti2022Light_XCiT-L12        | 91.73 | 86.59                | 78.09           | 79.42                | 66.77           | 57.58                | 44.90           |
| Debenedetti2022Light_XCiT-M12        | 91.30 | 86.14                | 77.83           | 78.89                | 66.86           | 57.27                | 43.90           |
| Debenedetti2022Light_XCiT-S12        | 90.06 | 84.91                | 77.11           | 77.50                | 65.35           | 56.14                | 44.28           |
| Engstrom2019Robustness               | 87.03 | 80.34                | 74.30           | 72.22                | 63.43           | 49.25                | 41.85           |
| Gowal2020Uncovering_28_10_extra      | 89.48 | 84.78                | 78.08           | 78.77                | 67.93           | 62.80                | 48.51           |
| Gowal2020Uncovering_34_20            | 85.64 | 79.84                | 73.22           | 73.47                | 62.78           | 56.86                | 42.87           |
| Gowal2020Uncovering_70_16            | 85.29 | 79.81                | 72.89           | 73.47                | 62.25           | 57.20                | 43.29           |
| Gowal2020Uncovering_70_16_extra      | 91.10 | 86.86                | 79.81           | 81.06                | 70.01           | 65.88                | 50.55           |
| Gowal2021Improving_28_10_ddpm_100m   | 87.50 | 83.37                | 78.46           | 78.30                | 70.50           | 63.44                | 54.95           |
| Gowal2021Improving_70_16_ddpm_100m   | 88.74 | 84.76                | 80.48           | 80.08                | 73.27           | 66.11                | 59.34           |
| Gowal2021Improving_R18_ddpm_100m     | 87.35 | 82.08                | 76.83           | 76.22                | 68.16           | 58.63                | 51.17           |
| Hendrycks2019Using                   | 87.11 | 81.36                | 74.48           | 74.21                | 63.45           | 54.92                | 44.19           |
| Huang2020Self                        | 83.48 | 77.59                | 69.33           | 70.55                | 58.46           | 53.34                | 38.96           |
| Huang2021Exploring                   | 90.56 | 85.77                | 77.78           | 79.50                | 67.52           | 61.56                | 47.30           |
| Huang2021Exploring_ema               | 91.23 | 86.84                | 79.28           | 80.79                | 69.02           | 62.54                | 48.46           |
| Huang2022Revisiting_WRN-A4           | 91.59 | 87.35                | 79.76           | 81.69                | 69.62           | 65.79                | 50.22           |
| Jia2022LAS-AT_34_10                  | 84.98 | 79.26                | 73.00           | 72.44                | 62.88           | 56.26                | 43.92           |
| Jia2022LAS-AT_70_16                  | 85.66 | 80.29                | 73.90           | 73.52                | 63.76           | 57.61                | 44.19           |
| Pang2020Boosting                     | 85.14 | 79.34                | 71.93           | 72.60                | 61.17           | 53.74                | 39.40           |
| Pang2022Robustness_WRN28_10          | 88.61 | 83.73                | 78.46           | 77.16                | 69.51           | 61.04                | 51.67           |
| Pang2022Robustness_WRN70_16          | 89.01 | 84.77                | 79.57           | 78.58                | 70.61           | 63.35                | 52.93           |
| Rade2021Helper_ddpm                  | 88.16 | 83.26                | 77.54           | 76.83                | 67.49           | 60.97                | 47.37           |
| Rade2021Helper_extra                 | 91.47 | 86.72                | 80.47           | 80.29                | 69.48           | 62.83                | 47.57           |
| Rade2021Helper_R18_ddpm              | 86.86 | 81.12                | 75.67           | 74.39                | 64.92           | 57.09                | 43.99           |
| Rade2021Helper_R18_extra             | 89.02 | 83.21                | 77.16           | 76.36                | 66.10           | 57.67                | 43.38           |
| Rebuffi2021Fixing_106_16_cutmix_ddpm | 88.50 | 84.32                | 78.88           | 78.83                | 70.59           | 64.64                | 52.31           |
| Rebuffi2021Fixing_28_10_cutmix_ddpm  | 87.33 | 82.36                | 76.33           | 76.08                | 66.35           | 60.75                | 46.73           |
| Rebuffi2021Fixing_70_16_cutmix_ddpm  | 88.54 | 84.31                | 78.64           | 78.79                | 68.95           | 64.25                | 49.75           |
| Rebuffi2021Fixing_70_16_cutmix_extra | 92.23 | 88.02                | 81.21           | 82.76                | 70.39           | 66.58                | 47.97           |
| Rebuffi2021Fixing_R18_ddpm           | 83.53 | 77.99                | 71.46           | 71.68                | 61.83           | 56.66                | 44.26           |
| Rice2020Overfitting                  | 85.34 | 79.60                | 74.06           | 72.82                | 64.81           | 53.42                | 43.66           |
| Sehwag2020Hydra                      | 88.98 | 83.49                | 76.02           | 76.18                | 65.38           | 57.14                | 44.37           |
| Sehwag2021Proxy                      | 86.68 | 81.72                | 76.91           | 76.39                | 68.84           | 60.27                | 53.29           |
| Sehwag2021Proxy_R18                  | 84.59 | 79.25                | 73.87           | 72.74                | 64.73           | 55.54                | 46.58           |
| Sehwag2021Proxy_ResNest152           | 87.21 | 82.55                | 78.08           | 77.30                | 70.78           | 62.79                | 56.67           |
| Sitawarin2020Improving               | 86.84 | 80.21                | 74.16           | 72.47                | 63.54           | 50.72                | 43.25           |
| Sridhar2021Robust                    | 89.46 | 84.34                | 77.42           | 78.03                | 66.42           | 59.66                | 46.45           |
| Sridhar2021Robust_34_15              | 86.53 | 81.45                | 73.95           | 75.63                | 64.18           | 60.41                | 45.77           |
| Wang2020Improving                    | 87.51 | 82.15                | 74.59           | 75.47                | 63.17           | 56.29                | 42.57           |
| Wang2023Better_WRN-28-10             | 92.44 | 88.40                | 81.51           | 83.10                | 71.42           | 67.31                | 52.03           |
| Wang2023Better_WRN-70-16             | 93.26 | 89.72                | 82.88           | 84.90                | 73.95           | 70.69                | 55.17           |
| Wong2020Fast                         | 83.34 | 75.77                | 69.60           | 67.23                | 58.38           | 43.21                | 36.96           |
| Wu2020Adversarial                    | 85.36 | 79.69                | 73.33           | 72.90                | 62.64           | 56.17                | 42.28           |
| Wu2020Adversarial_extra              | 88.25 | 82.98                | 76.83           | 76.61                | 66.45           | 60.04                | 46.70           |
| Zhang2019Theoretically               | 84.92 | 78.96                | 71.68           | 71.15                | 60.30           | 53.08                | 40.05           |
| Zhang2019You                         | 87.20 | 79.42                | 72.40           | 70.29                | 60.61           | 44.83                | 36.65           |
| Zhang2020Attacks                     | 84.52 | 78.48                | 71.10           | 71.32                | 59.45           | 53.51                | 40.76           |
| Zhang2020Geometry                    | 89.36 | 84.01                | 81.57           | 77.10                | 73.45           | 59.64                | 53.50           |



Table F.3: Complete list of  $\mathcal{R}$  and its bounds under  $(\mathcal{W}_\infty, l_2)$  threat model based on CE loss.

| Network                              | $\delta=1/8$  |                       |                       | $\delta=1/4$  |                       |                       |
|--------------------------------------|---------------|-----------------------|-----------------------|---------------|-----------------------|-----------------------|
|                                      | $\mathcal{R}$ | $\Delta\mathcal{R}^u$ | $\Delta\mathcal{R}^l$ | $\mathcal{R}$ | $\Delta\mathcal{R}^u$ | $\Delta\mathcal{R}^l$ |
| Augustin2020Adversarial              | 0.9649        | 0.0026                | -0.0153               | 0.9275        | 0.0083                | -0.0324               |
| Augustin2020Adversarial_34_10        | 0.9669        | 0.0035                | -0.0097               | 0.9303        | 0.0115                | -0.0201               |
| Augustin2020Adversarial_34_10_extra  | 0.9752        | 0.0031                | -0.0150               | 0.9400        | 0.0084                | -0.0239               |
| Ding2020MMA                          | 0.9496        | 0.0016                | -0.0176               | 0.8912        | 0.0081                | -0.0434               |
| Engstrom2019Robustness               | 0.9557        | 0.0019                | -0.0087               | 0.9069        | 0.0057                | -0.0256               |
| Gowal2020Uncovering                  | 0.9640        | 0.0022                | -0.0063               | 0.9271        | 0.0045                | -0.0191               |
| Gowal2020Uncovering_extra            | 0.9779        | 0.0013                | -0.0121               | 0.9451        | 0.0050                | -0.0209               |
| Rade2021Helper_R18_ddpm              | 0.9720        | 0.0017                | -0.0124               | 0.9339        | 0.0061                | -0.0209               |
| Rebuffi2021Fixing_28_10_cutmix_ddpm  | 0.9724        | 0.0034                | -0.0107               | 0.9416        | 0.0060                | -0.0232               |
| Rebuffi2021Fixing_70_16_cutmix_ddpm  | 0.9778        | 0.0021                | -0.0137               | 0.9489        | 0.0052                | -0.0259               |
| Rebuffi2021Fixing_70_16_cutmix_extra | 0.9795        | 0.0018                | -0.0091               | 0.9524        | 0.0040                | -0.0184               |
| Rebuffi2021Fixing_R18_cutmix_ddpm    | 0.9686        | 0.0032                | -0.0150               | 0.9352        | 0.0061                | -0.0339               |
| Rice2020Overfitting                  | 0.9593        | 0.0030                | -0.0178               | 0.9061        | 0.0090                | -0.0342               |
| Rony2019Decoupling                   | 0.9517        | 0.0015                | -0.0144               | 0.8899        | 0.0077                | -0.0316               |
| Schwag2021Proxy                      | 0.9724        | 0.0027                | -0.0099               | 0.9420        | 0.0065                | -0.0235               |
| Schwag2021Proxy_R18                  | 0.9703        | 0.0028                | -0.0133               | 0.9344        | 0.0057                | -0.0271               |
| Wang2023Better_WRN-28-10             | 0.9819        | 0.0013                | -0.0098               | 0.9541        | 0.0047                | -0.0147               |
| Wang2023Better_WRN-70-16             | 0.9814        | 0.0015                | -0.0069               | 0.9609        | 0.0029                | -0.0163               |
| Wu2020Adversarial                    | 0.9640        | 0.0024                | -0.0088               | 0.9270        | 0.0051                | -0.0221               |

Table F.4: Complete list of  $\mathcal{R}$  and its bounds under  $(\mathcal{W}_2, l_2)$  threat model based on ReDLR loss.

| Network                              | $\delta=1/32$ |                       |                       | $\delta=1/16$ |                       |                       |
|--------------------------------------|---------------|-----------------------|-----------------------|---------------|-----------------------|-----------------------|
|                                      | $\mathcal{R}$ | $\Delta\mathcal{R}^u$ | $\Delta\mathcal{R}^l$ | $\mathcal{R}$ | $\Delta\mathcal{R}^u$ | $\Delta\mathcal{R}^l$ |
| Augustin2020Adversarial              | 0.9844        | 0.0058                | -0.0358               | 0.9723        | 0.0131                | -0.0505               |
| Augustin2020Adversarial_34_10        | 0.9868        | 0.0026                | -0.0518               | 0.9738        | 0.0094                | -0.0743               |
| Augustin2020Adversarial_34_10_extra  | 0.9879        | 0.0049                | -0.0452               | 0.9756        | 0.0105                | -0.0652               |
| Ding2020MMA                          | 0.9788        | 0.0087                | -0.0694               | 0.9644        | 0.0148                | -0.1079               |
| Engstrom2019Robustness               | 0.9834        | 0.0036                | -0.0798               | 0.9719        | 0.0085                | -0.1250               |
| Gowal2020Uncovering                  | 0.9837        | 0.0048                | -0.0581               | 0.9719        | 0.0110                | -0.0918               |
| Gowal2020Uncovering_extra            | 0.9915        | 0.0026                | -0.0574               | 0.9855        | 0.0039                | -0.0898               |
| Rade2021Helper_R18_ddpm              | 0.9879        | 0.0055                | -0.0530               | 0.9802        | 0.0075                | -0.0871               |
| Rebuffi2021Fixing_28_10_cutmix_ddpm  | 0.9902        | 0.0034                | -0.0572               | 0.9826        | 0.0069                | -0.0912               |
| Rebuffi2021Fixing_70_16_cutmix_ddpm  | 0.9920        | 0.0023                | -0.0610               | 0.9852        | 0.0055                | -0.0966               |
| Rebuffi2021Fixing_70_16_cutmix_extra | 0.9922        | 0.0020                | -0.0539               | 0.9851        | 0.0050                | -0.0852               |
| Rebuffi2021Fixing_R18_cutmix_ddpm    | 0.9894        | 0.0034                | -0.0711               | 0.9791        | 0.0081                | -0.1104               |
| Rice2020Overfitting                  | 0.9859        | 0.0046                | -0.0825               | 0.9738        | 0.0104                | -0.1263               |
| Rony2019Decoupling                   | 0.9829        | 0.0045                | -0.0855               | 0.9672        | 0.0116                | -0.1267               |
| Schwag2021Proxy                      | 0.9918        | 0.0018                | -0.0767               | 0.9824        | 0.0047                | -0.1165               |
| Schwag2021Proxy_R18                  | 0.9890        | 0.0039                | -0.0558               | 0.9789        | 0.0097                | -0.0868               |
| Wang2023Better_WRN-28-10             | 0.9902        | 0.0023                | -0.0492               | 0.9832        | 0.0054                | -0.0775               |
| Wang2023Better_WRN-70-16             | 0.9919        | 0.0020                | -0.0494               | 0.9850        | 0.0043                | -0.0780               |
| Wu2020Adversarial                    | 0.9867        | 0.0037                | -0.0704               | 0.9759        | 0.0092                | -0.1114               |

Table F.5: Complete list of  $\mathcal{R}$  and its bounds under  $(\mathcal{W}_\infty, l_\infty)$  threat model based on CE loss.

| Network                              | $\delta=2/255$ |                       |                       | $\delta=4/255$ |                       |                       |
|--------------------------------------|----------------|-----------------------|-----------------------|----------------|-----------------------|-----------------------|
|                                      | $\mathcal{R}$  | $\Delta\mathcal{R}^u$ | $\Delta\mathcal{R}^l$ | $\mathcal{R}$  | $\Delta\mathcal{R}^u$ | $\Delta\mathcal{R}^l$ |
| Addepalli2021Towards_RN18            | 0.9205         | 0.0172                | -0.0234               | 0.8314         | 0.0403                | -0.0390               |
| Addepalli2021Towards_WRN34           | 0.9361         | 0.0144                | -0.0266               | 0.8577         | 0.0374                | -0.0399               |
| Addepalli2022Efficient_RN18          | 0.9236         | 0.0126                | -0.0194               | 0.8327         | 0.0329                | -0.0312               |
| Addepalli2022Efficient_WRN_34_10     | 0.9352         | 0.0097                | -0.0167               | 0.8514         | 0.0275                | -0.0218               |
| Andriushchenko2020Understanding      | 0.9054         | 0.0125                | -0.0200               | 0.8071         | 0.0296                | -0.0496               |
| Carmon2019Unlabeled                  | 0.9431         | 0.0056                | -0.0122               | 0.8682         | 0.0236                | -0.0144               |
| Chen2020Adversarial                  | 0.9261         | 0.0074                | -0.0319               | 0.8323         | 0.0206                | -0.0495               |
| Chen2020Efficient                    | 0.9199         | 0.0111                | -0.0107               | 0.8273         | 0.0293                | -0.0177               |
| Chen2021LTD_WRN34_10                 | 0.9363         | 0.0099                | -0.0224               | 0.8564         | 0.0275                | -0.0347               |
| Chen2021LTD_WRN34_20                 | 0.9382         | 0.0105                | -0.0280               | 0.8624         | 0.0322                | -0.0476               |
| Cui2020Learnable_34_10               | 0.9290         | 0.0070                | -0.0178               | 0.8410         | 0.0196                | -0.0324               |
| Cui2020Learnable_34_20               | 0.9267         | 0.0079                | -0.0150               | 0.8395         | 0.0224                | -0.0296               |
| Dai2021Parameterizing                | 0.9468         | 0.0069                | -0.0173               | 0.8844         | 0.0139                | -0.0362               |
| Debenedetti2022Light_XCiT-L12        | 0.9440         | 0.0041                | -0.0154               | 0.8658         | 0.0162                | -0.0233               |
| Debenedetti2022Light_XCiT-M12        | 0.9435         | 0.0049                | -0.0164               | 0.8641         | 0.0194                | -0.0233               |
| Debenedetti2022Light_XCiT-S12        | 0.9428         | 0.0048                | -0.0239               | 0.8605         | 0.0198                | -0.0357               |
| Engstrom2019Robustness               | 0.9231         | 0.0101                | -0.0203               | 0.8298         | 0.0263                | -0.0406               |
| Gowal2020Uncovering_28_10_extra      | 0.9476         | 0.0072                | -0.0149               | 0.8803         | 0.0221                | -0.0214               |
| Gowal2020Uncovering_34_20            | 0.9323         | 0.0081                | -0.0156               | 0.8579         | 0.0206                | -0.0331               |
| Gowal2020Uncovering_70_16            | 0.9357         | 0.0055                | -0.0144               | 0.8614         | 0.0155                | -0.0279               |
| Gowal2020Uncovering_70_16_extra      | 0.9535         | 0.0050                | -0.0129               | 0.8898         | 0.0196                | -0.0137               |
| Gowal2021Improving_28_10_ddpm_100m   | 0.9528         | 0.0073                | -0.0192               | 0.8949         | 0.0177                | -0.0347               |
| Gowal2021Improving_70_16_ddpm_100m   | 0.9551         | 0.0061                | -0.0147               | 0.9024         | 0.0169                | -0.0265               |
| Gowal2021Improving_R18_ddpm_100m     | 0.9397         | 0.0065                | -0.0166               | 0.8726         | 0.0117                | -0.0387               |
| Hendrycks2019Using                   | 0.9340         | 0.0057                | -0.0250               | 0.8519         | 0.0215                | -0.0447               |
| Huang2020Self                        | 0.9294         | 0.0075                | -0.0139               | 0.8451         | 0.0270                | -0.0201               |
| Huang2021Exploring                   | 0.9471         | 0.0051                | -0.0091               | 0.8779         | 0.0227                | -0.0091               |
| Huang2021Exploring_ema               | 0.9519         | 0.0054                | -0.0103               | 0.8856         | 0.0226                | -0.0103               |
| Huang2022Revisiting_WRN-A4           | 0.9537         | 0.0052                | -0.0101               | 0.8919         | 0.0167                | -0.0127               |
| Jia2022LAS-AT_34_10                  | 0.9327         | 0.0102                | -0.0173               | 0.8524         | 0.0262                | -0.0277               |
| Jia2022LAS-AT_70_16                  | 0.9372         | 0.0070                | -0.0178               | 0.8585         | 0.0229                | -0.0262               |
| Pang2020Boosting                     | 0.9319         | 0.0181                | -0.0349               | 0.8526         | 0.0430                | -0.0611               |
| Pang2022Robustness_WRN28_10          | 0.9449         | 0.0095                | -0.0199               | 0.8708         | 0.0229                | -0.0325               |
| Pang2022Robustness_WRN70_16          | 0.9524         | 0.0056                | -0.0220               | 0.8828         | 0.0225                | -0.0331               |
| Rade2021Helper_ddpm                  | 0.9444         | 0.0068                | -0.0195               | 0.8715         | 0.0188                | -0.0317               |
| Rade2021Helper_extra                 | 0.9481         | 0.0057                | -0.0158               | 0.8778         | 0.0186                | -0.0247               |
| Rade2021Helper_R18_ddpm              | 0.9339         | 0.0098                | -0.0203               | 0.8564         | 0.0220                | -0.0407               |
| Rade2021Helper_R18_extra             | 0.9347         | 0.0095                | -0.0183               | 0.8578         | 0.0220                | -0.0370               |
| Rebuffi2021Fixing_106_16_cutmix_ddpm | 0.9528         | 0.0063                | -0.0196               | 0.8907         | 0.0226                | -0.0295               |
| Rebuffi2021Fixing_28_10_cutmix_ddpm  | 0.9432         | 0.0088                | -0.0193               | 0.8713         | 0.0262                | -0.0286               |
| Rebuffi2021Fixing_70_16_cutmix_ddpm  | 0.9522         | 0.0071                | -0.0204               | 0.8899         | 0.0208                | -0.0311               |
| Rebuffi2021Fixing_70_16_cutmix_extra | 0.9544         | 0.0051                | -0.0169               | 0.8973         | 0.0191                | -0.0282               |
| Rebuffi2021Fixing_R18_ddpm           | 0.9337         | 0.0078                | -0.0140               | 0.8584         | 0.0242                | -0.0270               |
| Rice2020Overfitting                  | 0.9327         | 0.0091                | -0.0273               | 0.8532         | 0.0199                | -0.0548               |
| Sehwag2020Hydra                      | 0.9383         | 0.0055                | -0.0123               | 0.8561         | 0.0262                | -0.0126               |
| Sehwag2021Proxy                      | 0.9428         | 0.0073                | -0.0150               | 0.8813         | 0.0166                | -0.0348               |
| Sehwag2021Proxy_R18                  | 0.9369         | 0.0091                | -0.0209               | 0.8598         | 0.0240                | -0.0364               |
| Sehwag2021Proxy_ResNest152           | 0.9466         | 0.0062                | -0.0138               | 0.8864         | 0.0151                | -0.0308               |
| Sitawarin2020Improving               | 0.9237         | 0.0084                | -0.0190               | 0.8345         | 0.0243                | -0.0428               |
| Sridhar2021Robust                    | 0.9428         | 0.0063                | -0.0112               | 0.8722         | 0.0221                | -0.0171               |
| Sridhar2021Robust_34_15              | 0.9413         | 0.0067                | -0.0065               | 0.8740         | 0.0208                | -0.0089               |
| Wang2020Improving                    | 0.9387         | 0.0119                | -0.0216               | 0.8624         | 0.0362                | -0.0303               |
| Wang2023Better_WRN-28-10             | 0.9563         | 0.0067                | -0.0149               | 0.8990         | 0.0166                | -0.0248               |
| Wang2023Better_WRN-70-16             | 0.9620         | 0.0049                | -0.0149               | 0.9104         | 0.0165                | -0.0239               |
| Wong2020Fast                         | 0.9093         | 0.0128                | -0.0282               | 0.8068         | 0.0301                | -0.0608               |
| Wu2020Adversarial                    | 0.9336         | 0.0068                | -0.0161               | 0.8540         | 0.0225                | -0.0267               |
| Wu2020Adversarial_extra              | 0.9403         | 0.0073                | -0.0139               | 0.8681         | 0.0228                | -0.0230               |
| Zhang2019Theoretically               | 0.9298         | 0.0061                | -0.0190               | 0.8381         | 0.0238                | -0.0289               |
| Zhang2019You                         | 0.9107         | 0.0073                | -0.0196               | 0.8061         | 0.0203                | -0.0506               |
| Zhang2020Attacks                     | 0.9285         | 0.0082                | -0.0167               | 0.8438         | 0.0257                | -0.0267               |
| Zhang2020Geometry                    | 0.9402         | 0.0187                | -0.0307               | 0.8629         | 0.0404                | -0.0514               |

Table F.6: Complete list of  $\mathcal{R}$  and its bounds under  $(\mathcal{W}_2, l_\infty)$  threat model based on ReDLR loss.

| Network                              | $\delta=1/510$ |                       |                       | $\delta=1/255$ |                       |                       |
|--------------------------------------|----------------|-----------------------|-----------------------|----------------|-----------------------|-----------------------|
|                                      | $\mathcal{R}$  | $\Delta\mathcal{R}^u$ | $\Delta\mathcal{R}^l$ | $\mathcal{R}$  | $\Delta\mathcal{R}^u$ | $\Delta\mathcal{R}^l$ |
| Addepalli2021Towards_RN18            | 0.9762         | 0.0080                | -0.1301               | 0.9533         | 0.0202                | -0.1902               |
| Addepalli2021Towards_WRN34           | 0.9774         | 0.0102                | -0.0849               | 0.9590         | 0.0197                | -0.1257               |
| Addepalli2022Efficient_RN18          | 0.9740         | 0.0088                | -0.1012               | 0.9534         | 0.0195                | -0.1480               |
| Addepalli2022Efficient_WRN_34_10     | 0.9749         | 0.0124                | -0.0645               | 0.9563         | 0.0231                | -0.0942               |
| Andriushchenko2020Understanding      | 0.9679         | 0.0140                | -0.0969               | 0.9438         | 0.0294                | -0.1357               |
| Carmon2019Unlabeled                  | 0.9775         | 0.0079                | -0.0803               | 0.9584         | 0.0178                | -0.1162               |
| Chen2020Adversarial                  | 0.9639         | 0.0182                | -0.0351               | 0.9371         | 0.0351                | -0.0485               |
| Chen2020Efficient                    | 0.9713         | 0.0147                | -0.0742               | 0.9495         | 0.0281                | -0.1073               |
| Chen2021LTD_WRN34_10                 | 0.9758         | 0.0140                | -0.0622               | 0.9578         | 0.0236                | -0.0960               |
| Chen2021LTD_WRN34_20                 | 0.9780         | 0.0078                | -0.1077               | 0.9635         | 0.0124                | -0.1615               |
| Cui2020Learnable_34_10               | 0.9694         | 0.0121                | -0.0663               | 0.9462         | 0.0228                | -0.0838               |
| Cui2020Learnable_34_20               | 0.9710         | 0.0132                | -0.0722               | 0.9492         | 0.0231                | -0.0982               |
| Dai2021Parameterizing                | 0.9814         | 0.0082                | -0.0825               | 0.9654         | 0.0164                | -0.1206               |
| Debenedetti2022Light_XCiT-L12        | 0.9760         | 0.0076                | -0.0730               | 0.9579         | 0.0181                | -0.1063               |
| Debenedetti2022Light_XCiT-M12        | 0.9781         | 0.0127                | -0.0477               | 0.9574         | 0.0280                | -0.0682               |
| Debenedetti2022Light_XCiT-S12        | 0.9795         | 0.0078                | -0.0911               | 0.9620         | 0.0161                | -0.1370               |
| Engstrom2019Robustness               | 0.9746         | 0.0086                | -0.1117               | 0.9550         | 0.0174                | -0.1600               |
| Gowal2020Uncovering_28_10_extra      | 0.9791         | 0.0075                | -0.0813               | 0.9623         | 0.0153                | -0.1213               |
| Gowal2020Uncovering_34_20            | 0.9748         | 0.0110                | -0.0786               | 0.9546         | 0.0220                | -0.1166               |
| Gowal2020Uncovering_70_16            | 0.9722         | 0.0162                | -0.0583               | 0.9552         | 0.0232                | -0.0906               |
| Gowal2020Uncovering_70_16_extra      | 0.9801         | 0.0070                | -0.0786               | 0.9639         | 0.0136                | -0.1145               |
| Gowal2021Improving_28_10_ddpm_100m   | 0.9814         | 0.0070                | -0.0852               | 0.9690         | 0.0119                | -0.1281               |
| Gowal2021Improving_70_16_ddpm_100m   | 0.9838         | 0.0072                | -0.0778               | 0.9726         | 0.0114                | -0.1150               |
| Gowal2021Improving_R18_ddpm_100m     | 0.9797         | 0.0069                | -0.1049               | 0.9626         | 0.0160                | -0.1520               |
| Hendrycks2019Using                   | 0.9778         | 0.0090                | -0.0963               | 0.9582         | 0.0183                | -0.1398               |
| Huang2020Self                        | 0.9714         | 0.0117                | -0.0764               | 0.9478         | 0.0252                | -0.1082               |
| Huang2021Exploring                   | 0.9770         | 0.0109                | -0.0556               | 0.9593         | 0.0208                | -0.0803               |
| Huang2021Exploring_ema               | 0.9792         | 0.0091                | -0.0625               | 0.9623         | 0.0189                | -0.0923               |
| Huang2022Revisiting_WRN-A4           | 0.9810         | 0.0088                | -0.0521               | 0.9646         | 0.0181                | -0.0766               |
| Jia2022LAS-AT_34_10                  | 0.9762         | 0.0139                | -0.0743               | 0.9575         | 0.0232                | -0.1118               |
| Jia2022LAS-AT_70_16                  | 0.9751         | 0.0138                | -0.0707               | 0.9583         | 0.0219                | -0.1091               |
| Pang2020Boosting                     | 0.9745         | 0.0093                | -0.0244               | 0.9528         | 0.0195                | -0.0330               |
| Pang2022Robustness_WRN28_10          | 0.9823         | 0.0055                | -0.1311               | 0.9707         | 0.0095                | -0.1988               |
| Pang2022Robustness_WRN70_16          | 0.9836         | 0.0078                | -0.0882               | 0.9711         | 0.0139                | -0.1378               |
| Rade2021Helper_ddpm                  | 0.9808         | 0.0068                | -0.0936               | 0.9672         | 0.0124                | -0.1430               |
| Rade2021Helper_extra                 | 0.9809         | 0.0066                | -0.0846               | 0.9674         | 0.0130                | -0.1298               |
| Rade2021Helper_R18_ddpm              | 0.9778         | 0.0056                | -0.1266               | 0.9627         | 0.0098                | -0.1904               |
| Rade2021Helper_R18_extra             | 0.9784         | 0.0127                | -0.0720               | 0.9587         | 0.0244                | -0.1073               |
| Rebuffi2021Fixing_106_16_cutmix_ddpm | 0.9829         | 0.0046                | -0.0787               | 0.9681         | 0.0130                | -0.1163               |
| Rebuffi2021Fixing_28_10_cutmix_ddpm  | 0.9816         | 0.0050                | -0.1001               | 0.9651         | 0.0115                | -0.1436               |
| Rebuffi2021Fixing_70_16_cutmix_ddpm  | 0.9824         | 0.0072                | -0.0694               | 0.9680         | 0.0141                | -0.1035               |
| Rebuffi2021Fixing_70_16_cutmix_extra | 0.9809         | 0.0056                | -0.0718               | 0.9661         | 0.0126                | -0.1058               |
| Rebuffi2021Fixing_R18_ddpm           | 0.9758         | 0.0104                | -0.0855               | 0.9564         | 0.0194                | -0.1276               |
| Rice2020Overfitting                  | 0.9773         | 0.0082                | -0.1061               | 0.9593         | 0.0159                | -0.1547               |
| Sehwag2020Hydra                      | 0.9758         | 0.0096                | -0.0805               | 0.9577         | 0.0192                | -0.1201               |
| Sehwag2021Proxy                      | 0.9818         | 0.0073                | -0.0831               | 0.9657         | 0.0162                | -0.1202               |
| Sehwag2021Proxy_R18                  | 0.9795         | 0.0071                | -0.0964               | 0.9609         | 0.0154                | -0.1370               |
| Sehwag2021Proxy_ResNest152           | 0.9805         | 0.0144                | -0.0361               | 0.9667         | 0.0243                | -0.0573               |
| Sitawarin2020Improving               | 0.9747         | 0.0088                | -0.1054               | 0.9511         | 0.0204                | -0.1505               |
| Sridhar2021Robust                    | 0.9766         | 0.0087                | -0.0832               | 0.9594         | 0.0160                | -0.1240               |
| Sridhar2021Robust_34_15              | 0.9749         | 0.0105                | -0.0602               | 0.9537         | 0.0221                | -0.0858               |
| Wang2020Improving                    | 0.9738         | 0.0195                | -0.0134               | 0.9552         | 0.0341                | -0.0185               |
| Wang2023Better_WRN-28-10             | 0.9840         | 0.0054                | -0.0767               | 0.9692         | 0.0129                | -0.1120               |
| Wang2023Better_WRN-70-16             | 0.9835         | 0.0049                | -0.0747               | 0.9727         | 0.0074                | -0.1121               |
| Wong2020Fast                         | 0.9674         | 0.0163                | -0.0901               | 0.9448         | 0.0268                | -0.1281               |
| Wu2020Adversarial                    | 0.9776         | 0.0089                | -0.0837               | 0.9577         | 0.0221                | -0.1215               |
| Wu2020Adversarial_extra              | 0.9778         | 0.0077                | -0.0963               | 0.9588         | 0.0158                | -0.1419               |
| Zhang2019Theoretically               | 0.9774         | 0.0132                | -0.0670               | 0.9565         | 0.0277                | -0.1003               |
| Zhang2019You                         | 0.9720         | 0.0135                | -0.1073               | 0.9502         | 0.0247                | -0.1580               |
| Zhang2020Attacks                     | 0.9724         | 0.0208                | -0.0225               | 0.9504         | 0.0386                | -0.0312               |
| Zhang2020Geometry                    | 0.9875         | 0.0035                | -0.1267               | 0.9777         | 0.0068                | -0.1838               |
